# Supplementary material for: Contemporary Wildfires Not More Severe Than Historically: More Fire of All Severities Needed to Sustain and Adapt Western US Dry Forests as Climate Changes
Source: MDPI journal article supplement (doi:10.3390/su16083270), 2024-04-14
Supplement: s1 [file s1]

Table S1. Corrected Landfire BPS models used in this study. Types are: 1 = pine, 2 = dry mixed conifer. Both Low- and Moderate-Severity Fire Rotations were corrected, as explained in the text, by multiplying them each by 1.715. Then, all the “% of Total Fire” columns were recalculated.

| Type | BPS_MODEL                  | BPS_NAME                                                              | Fire Rotat. (yrs) |      |     |     | % of Total Fire |      |     |
|------|----------------------------|-----------------------------------------------------------------------|-------------------|------|-----|-----|-----------------|------|-----|
|      |                            |                                                                       | High              | Mod. | Low | All | High            | Mod. | Low |
| 2    | 10210_2_3_6_7              | Klamath-Siskiyou Lower Montane Serpentine Mixed Conifer Woodland      | 229               | 120  | 19  | 15  | 6               | 13   | 81  |
| 1    | 10240_14_15_24             | Madrean Lower Montane Pine-Oak Forest and Woodland                    | 125               | 328  | 57  | 35  | 28              | 11   | 61  |
| 1    | 10240_25_27                | Madrean Lower Montane Pine-Oak Forest and Woodland                    | 60                | 51   | 19  | 11  | 19              | 22   | 59  |
| 1    | 10240_26                   | Madrean Lower Montane Pine-Oak Forest and Woodland                    | 16                | 41   | 17  | 7   | 43              | 17   | 40  |
| 2    | 10260_15                   | Madrean Upper Montane Conifer-Oak Forest and Woodland                 | 305               | 106  | 22  | 17  | 6               | 16   | 78  |
| 2    | 10270_2_3_7                | Mediterr. Calif. Dry-Mesic Mixed Conifer Forest and Woodland          | 337               | 55   | 21  | 14  | 4               | 27   | 69  |
| 2    | 10270_4_5_6                | Mediterr. Calif. Dry-Mesic Mixed Conifer Forest and Woodland          | 150               | 60   | 29  | 17  | 12              | 29   | 59  |
| 1    | 10300_2_3_4_5_6_7          | Mediterr. Calif. Lower Montane Black Oak-Conifer Forest and Woodland  | 176               | 65   | 26  | 17  | 9               | 26   | 65  |
| 1    | 10310_2_3_4_5_6_12         | Calif. Montane Jeffrey Pine(-Ponderosa Pine) Woodland                 | 165               | 144  | 19  | 15  | 9               | 11   | 80  |
| 1    | 10310_7                    | Calif. Montane Jeffrey Pine(-Ponderosa Pine) Woodland                 | 200               | 202  | 45  | 31  | 16              | 15   | 69  |
| 2    | 10450_1_7_8_9              | N. Rocky Mt. Dry-Mesic Montane Mixed Conifer Forest                   | 184               | 184  | 55  | 34  | 19              | 19   | 62  |
| 2    | 10450_21                   | N. Rocky Mt. Dry-Mesic Montane Mixed Conifer Forest                   | 76                | 185  | 463 | 48  | 64              | 26   | 10  |
| 2    | 10451_10_19                | N. Rocky Mt. Dry-Mesic Montane Mixed Conifer Forest-Ponderosa Pine-Do | 148               | 87   | 67  | 30  | 20              | 35   | 45  |
| 2    | 10451_20                   | N. Rocky Mt. Dry-Mesic Montane Mixed Conifer Forest-Ponderosa Pine-Do | 163               | 87   | 74  | 32  | 20              | 37   | 43  |
| 2    | 10452_10_19                | N. Rocky Mt. Dry-Mesic Montane Mixed Conifer Forest-Larch             | 202               | 118  | 235 | 57  | 28              | 48   | 24  |
| 2    | 10454_20                   | N. Rocky Mt. Dry-Mesic Montane Mixed Conifer Forest-Lodgepole Pine    | 145               | 475  | 664 | 95  | 66              | 20   | 14  |
| 2    | 10510_15_16_17_22_23_24_25 | S. Rocky Mt. Dry-Mesic Montane Mixed Conifer Forest and Woodland      | 90                | 132  | 24  | 17  | 18              | 13   | 69  |
| 2    | 10510_18_21                | S. Rocky Mt. Dry-Mesic Montane Mixed Conifer Forest and Woodland      | 90                | 132  | 24  | 17  | 18              | 13   | 69  |
| 2    | 10510_27                   | S. Rocky Mt. Dry-Mesic Montane Mixed Conifer Forest and Woodland      | 279               | 98   | 57  | 32  | 11              | 33   | 56  |
| 2    | 10510_28                   | S. Rocky Mt. Dry-Mesic Montane Mixed Conifer Forest and Woodland      | 325               | 93   | 55  | 31  | 9               | 34   | 57  |
| 2    | 10510_29                   | S. Rocky Mt. Dry-Mesic Montane Mixed Conifer Forest and Woodland      | 94                | 132  | 24  | 17  | 18              | 12   | 70  |
| 2    | 10510_6                    | S. Rocky Mt. Dry-Mesic Montane Mixed Conifer Forest and Woodland      | 91                | 130  | 24  | 17  | 18              | 13   | 69  |
| 1    | 10530_10_19                | N. Rocky Mt. Ponderosa Pine Woodland and Savanna                      | 354               | 96   | 29  | 21  | 6               | 22   | 72  |
| 1    | 10531_1_7_8_9              | N. Rocky Mt. Ponderosa Pine Woodland and Savanna-Mesic                | 273               | 134  | 33  | 24  | 9               | 18   | 73  |
| 1    | 10532_7_9                  | N. Rocky Mt. Ponderosa Pine Woodland and Savanna-Xeric                | 258               | 172  | 233 | 72  | 28              | 41   | 31  |
| 1    | 10540_13_14                | S. Rocky Mt. Ponderosa Pine Woodland                                  | 254               | 67   | 47  | 25  | 10              | 38   | 52  |
| 1    | 10540_15_25                | S. Rocky Mt. Ponderosa Pine Woodland                                  | 396               | 185  | 17  | 15  | 4               | 8    | 88  |
| 1    | 10540_16_23_24             | S. Rocky Mt. Ponderosa Pine Woodland                                  | 280               | 388  | 34  | 28  | 10              | 7    | 83  |
| 1    | 10540_17                   | S. Rocky Mt. Ponderosa Pine Woodland                                  | 257               | 67   | 48  | 25  | 10              | 38   | 52  |
| 1    | 10540_20                   | S. Rocky Mt. Ponderosa Pine Woodland                                  | 232               | 132  | 33  | 24  | 10              | 18   | 72  |
| 1    | 10540_22                   | S. Rocky Mt. Ponderosa Pine Woodland                                  | 165               | 84   | 33  | 21  | 12              | 25   | 63  |
| 1    | 10540_28                   | S. Rocky Mt. Ponderosa Pine Woodland                                  | 505               | 273  | 41  | 33  | 7               | 12   | 81  |
| 1    | 10540_29                   | S. Rocky Mt. Ponderosa Pine Woodland                                  | 303               | 454  | 34  | 29  | 10              | 6    | 84  |

|   |                |                                                                          |     |      |     |    |    |    |    |
|---|----------------|--------------------------------------------------------------------------|-----|------|-----|----|----|----|----|
| 1 | 10540_33       | S. Rocky Mt. Ponderosa Pine Woodland                                     | 511 | 273  | 51  | 40 | 8  | 14 | 78 |
| 1 | 10541_27       | S. Rocky Mt. Ponderosa Pine Woodland-South                               | 346 | 0    | 19  | 18 | 5  | 0  | 95 |
| 1 | 10542_27       | S. Rocky Mt. Ponderosa Pine Woodland-North                               | 505 | 274  | 53  | 41 | 8  | 15 | 77 |
| 1 | 10600_1_2_7    | East Cascades Oak-Ponderosa Pine Forest and Woodland                     | 383 | 1104 | 53  | 45 | 12 | 4  | 84 |
| 1 | 11170_13_15_28 | S. Rocky Mt. Ponderosa Pine Savanna                                      | 368 | 0    | 19  | 18 | 5  | 0  | 95 |
| 1 | 11170_16_23_24 | S. Rocky Mt. Ponderosa Pine Savanna                                      | 158 | 137  | 15  | 13 | 8  | 9  | 83 |
| 1 | 11170_20       | S. Rocky Mt. Ponderosa Pine Savanna                                      | 392 | 129  | 31  | 23 | 6  | 18 | 76 |
| 1 | 11170_29       | S. Rocky Mt. Ponderosa Pine Savanna                                      | 382 | 0    | 27  | 25 | 7  | 0  | 93 |
| 1 | 11170_33       | S. Rocky Mt. Ponderosa Pine Savanna                                      | 461 | 0    | 34  | 32 | 7  | 0  | 93 |
| 1 | 11171_27       | S. Rocky Mt. Ponderosa Pine Savanna-South                                | 521 | 0    | 21  | 20 | 5  | 0  | 95 |
| 1 | 11172_27       | S. Rocky Mt. Ponderosa Pine Savanna-North                                | 460 | 0    | 34  | 32 | 7  | 0  | 93 |
| 1 | 11650_1_7_8    | N. Rocky Mt. Foothill Conifer Wooded Steppe                              | 124 | 681  | 216 | 71 | 57 | 10 | 33 |
| 1 | 11650_9        | N. Rocky Mt. Foothill Conifer Wooded Steppe                              | 204 | 256  | 39  | 29 | 14 | 11 | 75 |
| 1 | 11791_29_30    | NW Great Plains-Black Hills Ponderosa Pine Woodland and Savanna-Low elev | 307 | 451  | 34  | 29 | 9  | 7  | 84 |
| 1 | 11792_29_30    | NW Great Plains-Black Hills Ponderosa Pine Woodland and Savanna-Savanna  | 387 | 0    | 26  | 24 | 6  | 0  | 94 |

Table S2. Historical fire rotations (FR) of high-severity fires in dry forests defined by this paper and by Parks et al. [4], based on Landfire BPS Models across the whole of each ecoregion, not just across BPS Models within recently burned areas, as is the case in Table 2 in the text. This large difference in scale is why fire rotations here at times differ from those in Table 2 in the text. Comparisons here show that dry forests using the Parks et al. [4] definitions and this study's definitions do not lead to much difference in historical fire rotations between the two studies. Also, note that fire rotations here and in Table 2 in the text are also generally not much different. These comparisons indicate that the exact BPS Model makeup of the forest type and whether BPS Models are analyzed only in recently burned areas or across the whole ecoregion do not have much effect in most cases. Note that Parks et al. did not include a Northeast ecoregion.

|                                  | <b>Baker, this paper</b> |                 | <b>Parks et al. [4]</b> |                 |
|----------------------------------|--------------------------|-----------------|-------------------------|-----------------|
| <b>Ecoregion</b>                 | <b>Area (ha)</b>         | <b>FR (yrs)</b> | <b>Area (ha)</b>        | <b>FR (yrs)</b> |
| <i>DRY FORESTS</i>               |                          |                 |                         |                 |
| All except Northeast             | 22,945,328               | 250             | 20,037,279              | 256             |
| California Coast                 | 651,586                  | 271             | 589,878                 | 280             |
| Western Mountains                | 5,494,973                | 239             | 4,659,707               | 240             |
| Northern Mountains               | 9,783,865                | 204             | 8,309,359               | 202             |
| Southwest                        | 7,014,904                | 305             | 6,478,335               | 321             |
| Northeast                        | 974,401                  | 330             | -                       | -               |
| <i>PINE FORESTS</i>              |                          |                 |                         |                 |
| All except Northeast             | 10,439,376               | 298             | 9,149,786               | 312             |
| California Coast                 | 73,488                   | 172             | 24,261                  | 165             |
| Western Mountains                | 2,875,906                | 217             | 2,171,064               | 213             |
| Northern Mountains               | 1,966,283                | 316             | 1,959,446               | 317             |
| Southwest                        | 5,523,699                | 326             | 4,995,015               | 349             |
| Northeast                        | 902,416                  | 344             | -                       | -               |
| <i>DRY MIXED-CONIFER FORESTS</i> |                          |                 |                         |                 |
| All                              | 12,505,952               | 204             | 10,887,493              | 202             |
| California Coast                 | 578,098                  | 284             | 565,617                 | 285             |
| Western Mountains                | 2,619,067                | 263             | 2,488,643               | 264             |
| Northern Mountains               | 7,817,582                | 176             | 6,349,913               | 166             |
| Southwest                        | 1,491,205                | 225             | 1,483,320               | 224             |
